# Supplementary material for: Change in household fuels dominates the decrease in PM2.5 exposure and premature mortality in China in 2005–2015
Source: PubMed Central journal article supplement — Proc Natl Acad Sci U S A. 2018 Nov 19;115(49):12401–6. doi: 10.1073/pnas.1812955115 (PMC6298076; doi:10.1073/pnas.1812955115), 2018-11-19
Supplement: pnas.1812955115.sapp.pdf [file pnas.1812955115.sapp.pdf]

# Supplementary Information for “Change in household fuels dominates the decrease in PM<sub>2.5</sub> exposure and premature mortality in China in 2005-2015”

## 1. Development of emission inventory

We develop an up-to-date emission inventory of SO<sub>2</sub>, NO<sub>x</sub>, PM<sub>10</sub>, PM<sub>2.5</sub>, BC, OC, NMVOC, and NH<sub>3</sub> in China for 2005-2015 using the “emission factor method” based on the activity data (energy consumption, industrial product yields, etc.), technology-based uncontrolled emission factors, and penetrations of control technologies. The methodology and data sources to develop the emission inventory were detailed in our previous papers (1-5), in which the emissions as of 2012 were calculated. Here we update the emission inventory till 2015, drawing upon the latest information on energy consumption, technology distribution, and control measures, from a variety of sources including statistical data, government bulletins, industrial associations, technological reports, and research surveys. As a focus of this study, we obtain the consumption of all fuels except biomass in the residential and commercial sectors in both urban and rural areas from the Energy Statistical Yearbook of China (6). All fuel consumption in the residential sector in rural areas is assumed to occur in the households, while in urban areas, the fraction of household-fuel use in total residential and commercial energy consumption is achieved from a detailed bottom-up model developed by the Tsinghua University Building Energy Research Center (Tsinghua-BERC) (7-11). SI Appendix Fig. S1a compares the rural coal consumption used in this study (i.e., official statistics) with the estimates from a representative national survey reported by Tao et al. (12), which collected the fuel use data for 2012 as well as recalled historical data for 2002 and 2007. The considerable discrepancy between these two data sources indicates a relatively large

uncertainty in rural coal consumption, which is considered in the Monto Carlo uncertainty analysis described in SI Appendix Section 3. In addition, we conducted a sensitivity analysis in which the IPWE in 2005-2015 and the contribution from household fuels were calculated using the rural coal consumption in Tao et al. (2018). In this case, the IPWE in 2005 is 3.5% larger than our current estimate. Also, household fuels are estimated to lead to a reduction of 81  $\mu\text{g}/\text{m}^3$  in IPWE from 2005 to 2015, representing 91% of the total IPWE reduction, which is also similar to the estimates in the current study (76  $\mu\text{g}/\text{m}^3$  and 90%). Therefore, the discrepancy in rural coal consumption does not change the conclusion of this study. For biomass consumption, there were no published official statistics after 2007. We obtain the statistics compiled by the Ministry of Agriculture of China (the data as of 2007 were published in *China Energy Statistical Yearbook* (13) and those after 2007 are unpublished), nationwide survey results from the Tsinghua-BERC (7-11), and the data from International Energy Agency (14), as summarized in SI Appendix Fig. S1. All these three datasets reveal a consistent trend, namely the biomass consumption in China decreased by over 50% during 2005-2015. In this study, we take the average of the former two datasets (which are bottom-up statistical or survey data by local institutes) as our “best estimate”, and account for the discrepancies among different datasets in the uncertainty analysis (SI Appendix Section 3). SI Appendix Fig. S1b shows that our “best estimate” agrees well with the survey data by Tao et al. (12) for years of 2002, 2007, and 2012. The household fuel use and sectoral emissions of major air pollutants are summarized in Fig. 2 and SI Appendix Table S1.

## 2. Configuration and evaluation of the CMAQ/2D-VBS simulations

We simulate the ambient concentrations of primary and secondary  $\text{PM}_{2.5}$  in China using the CMAQ/2D-VBS model, which was developed by incorporating the 2D-VBS model framework into the default CMAQ model (15). The CMAQ/2D-VBS model explicitly simulates the aging of

primary organic aerosol (POA), photo-oxidation of intermediate-volatility organic compounds (IVOCs) and multi-generational aging of secondary organic aerosol (SOA), thus improving the simulation results of SOA. Here we use the “High-Yield VBS” configuration documented in Zhao et al. (15), which agrees best with surface organic aerosol (OA) and SOA observational data. We apply the CMAQ/2D-VBS model to a domain covering China and its surrounding areas (see SI Appendix Fig. S2) with a grid resolution of 36 km×36 km. The Weather Research and Forecasting Model (WRF, version 3.7) is used to generate the meteorological fields. The physical and chemical options, vertical resolution, initial and boundary conditions of WRF and CMAQ/2D-VBS, as well as the spatial allocation of anthropogenic emissions and calculation of biogenic emissions are the same as Zhao et al. (16). The simulation periods cover 2005, 2010, and 2015, as well as 2013 for evaluation purpose.

We compare the meteorological parameters simulated by WRFv3.7 with observational data obtained from the National Climatic Data Center (NCDC), where hourly or 3-h observations are available for about 380 sites in the domain. The variables of interest include the temperature at 2 m, wind speed at 10 m, and humidity at 2 m. The statistical indices used include the mean observation (Mean OBS), mean simulation (Mean SIM), mean bias (MB), gross error (GE), root mean square error (RMSE), and index of agreement (IOA), the definitions of which are provided in Emery et al. (17). SI Appendix Table S2 summarizes the model performance statistics as well as the benchmarks suggested by Emery et al. (17). Obviously almost all indices fall within the benchmark range except that the MB of temperature slightly exceeds the range in a couple of cases. The occasional slight exceedance is considered to be reasonable since the benchmarks were derived based on performance statistics of meteorological simulations mostly at resolutions of

12 km or 4 km, which generally give more accurate predictions than those at 36 km resolution. Therefore, the statistics indicate an overall decent performance of meteorological predictions.

In addition, we compare the simulated aerosol optical depth (AOD) and NO<sub>2</sub> vertical column density with retrievals from the Moderate Resolution Imaging Spectroradiometer (MODIS) onboard the Aqua satellite (<http://ladsweb.nascom.nasa.gov/data/search.html>) and Ozone Monitoring Instrument (OMI) onboard the Aura satellite (<http://www.temis.nl/airpollution/no2.html>), respectively. Only model outputs that are closest to the satellite overpassing time (13:00-14:00 for both MODIS/Aqua and OMI/Aura, Beijing time) are used in comparison to avoid sampling errors due to diurnal cycles. The conversion of vertically resolved aerosol mass concentrations to AOD follows Heald (18) and Martin and Heald (19). SI Appendix Table S3 summarizes the model performance statistics over the Eastern and Central China (ECC, see SI Appendix Fig. S2). The ECC region covers most of the populous areas in China characterized by substantial anthropogenic emissions and high ambient PM<sub>2.5</sub> concentrations. In contrast, the remaining parts of China are significantly affected by natural sources (e.g., wind-blown dust) and foreign emissions, which are not the focus of this study. The statistical indices we apply are slightly different from those applied to the evaluation of meteorological predictions, so as to facilitate inter-study comparison with previous studies (e.g., Zhang et al. (20) and Zhao et al. (21)). These indices include Mean OBS, Mean SIM, normalized mean bias (NMB), normalized mean error (NME), mean fractional bias (MFB), mean fractional error (MFE), RMSE, and correlation coefficient (R), as documented in Yu et al. (22) and Boylan and Russell (23). The simulated NO<sub>2</sub> column agrees fairly well with OMI retrievals in all seasons; the NMBs and correlation coefficients are all  $\leq \pm 29\%$  and  $\geq 0.69$ , and are  $\leq \pm 20\%$  and  $\geq 0.80$  in most cases. There is also a good agreement between simulated and MODIS-retrieved annual mean

AOD, with NMBs within  $\pm 5\%$ , whilst the model tends to overestimate AOD in winter and underestimate AOD in summer. This is a common issue in previous CMAQ simulation studies in China (3, 24, 25) and is yet to be addressed in future investigations. With respect to the inter-annual trend which is the focus of the current study, the retrieved and simulated AOD show 17% and 18% decrease from 2005 to 2015, respectively, indicating a good agreement. Both OMI retrievals and CMAQ/2D-VBS simulations reveal that  $\text{NO}_2$  column increased dramatically from 2005 to 2010, followed by a significant decline from 2010 to 2015. The overall percentage changes from 2005 to 2015 are 10% and 5%, respectively.

For surface  $\text{PM}_{2.5}$  concentrations, there were no nationwide continuous observations during the simulation period since the observational network changed substantially between 2012 and 2013. Since January 2013, the Ministry of Environmental Protection of China (MEP, <http://datacenter.mep.gov.cn/>) provides hourly  $\text{PM}_{2.5}$  concentrations at 496 sites located in 74 major cities in China, including capital cities of all provinces and prefecture-level cities in three metropolitan regions (the North China Plain, Yangtze River Delta, and Pearl River Delta). The network had been expanded to cover 1497 sites in 367 cities by 2015. Before January 2013, however, MEP reported daily primary pollutant and its air pollution index (API) for 84 major cities, which differ significantly from the 74 major cities mentioned above. Using each city's API and primary pollutant, it is possible to back-calculate the daily average concentration for the primary pollutant ( $\text{PM}_{10}$  for most days) (26). In view of this situation, we make use of the  $\text{PM}_{2.5}$  concentrations in 2013 and 2015, as well as the API-derived  $\text{PM}_{10}$  concentrations in 2005 and 2010. Regarding the former, we only use the sites that are in operation in both 2013 and 2015 (473 sites in total) in order to evaluate the temporal trend. It should be noted that, while the target years are 2005, 2010, and 2015 in this study, we also perform simulations for 2013 to facilitate the

comparison with surface PM<sub>2.5</sub> measurements. SI Appendix Table S4 shows the performance statistics for PM<sub>10</sub> concentrations in 2005 and 2010 over the ECC region, while SI Appendix Table S5 presents the corresponding statistics for PM<sub>2.5</sub> concentrations in 2013 and 2015. While the model slightly underestimates the PM<sub>10</sub>/PM<sub>2.5</sub> concentrations partly due to the exclusion of fugitive dust emissions, the performance statistics all meet the model performance criteria proposed by Boylan and Russell (23) except for the MFB in the summer of 2005. With regard to the temporal trend, the modeled and observed PM<sub>10</sub> concentrations over ECC decreased by 6% and 7%, respectively, from 2005 to 2010. From 2013 to 2015, the decreasing rates of modeled and observed PM<sub>2.5</sub> concentrations are 24% and 23%, respectively. In summary, the simulated PM<sub>10</sub>/PM<sub>2.5</sub> concentrations generally agree well with nationwide surface observations.

### 3. Uncertainty analysis

We assess uncertainties in IPWE and the health effects using 50000 Monte Carlo runs based on uncertainties of the input data, including household-fuel consumption, main cooking fuel distributions, HAP exposure levels, and the integrated exposure-response (IER) functions. The household fuel consumption is assumed to be uniformly distributed, with the variation intervals being  $\pm 20\%$  for biomass and  $\pm 10\%$  for other fuel types, following previous studies (27, 28). Among the three nationwide statistics/surveys of biomass consumption (shown in SI Appendix Fig. S1), the largest deviation from the “best estimate” is about 21%, supporting the uncertainty range for biomass assumed above. For coal consumption, considering the relatively large discrepancy between the official statistics and the survey data (SI Appendix Fig. S1), we increase the variation intervals from  $\pm 10\%$  to  $\pm 30\%$ . The consequent uncertainty in the AAP exposure simulated by the CMAQ/2D-VBS model is estimated by performing a number of sensitivity simulations with perturbed household fuel consumption. The uncertainties in activity data of non-

household sources, the emission factors, as well as the model schemes are not considered because they are not supposed to be major factors affecting the contribution of household fuel use to changes in IPWE and health effects in the last decade, which is the focus of this study.

The populations using coal and biomass as main cooking fuels are also assumed to have a uniform distribution and the variation intervals are assumed to be 25% larger than those of the corresponding fuel consumption, since the cooking fuel-using populations in 2005/2015 are derived by integrating census data and fuel consumption statistics. The uncertainty in HAP exposure levels (i.e.,  $HAP_{j,k}$  in Eq. 2 of Methods) was estimated by Aunan et al. (29).

Regarding the health effects, Cohen et al. (30) provided 1000 sets of IER parameters for each health endpoint. In each of the 50000 Monte Carlo runs, a set of IER parameter is randomly chosen together with other randomly sampled inputs from the assumed probability distributions. The Monte Carlo simulation results constitute the probability distributions of IPWE and premature deaths, from which the 95% confidence intervals are derived.

We also discuss the influence of a couple of additional factors, including the relative toxicity of different PM<sub>2.5</sub> chemical components and the changes in stove technology over time, and show that they do not affect the major conclusion that household fuels are the leading contributor to the reduction of IPWE in China in the last decade (SI Appendix Section 4).

#### **4. Supplementary information for the IPWE and health impact calculation methods**

In the IPWE calculation method, we assume that ambient PM<sub>2.5</sub> pollution generally penetrates into the household (see Methods). This assumption ensures that the definition of AAP in this study is consistent with previous studies on AAP exposure (30-32), i.e., everyone within a given geographical unit is exposed to the prevailing AAP level. This assumption only affects the

partitioning between AAP and HAP, and does not affect the total IPWE. The assumption is mostly true for rural populations whose homes are usually not well sealed (33). For urban households, however, previous measurements (34-38) indicate that the indoor-outdoor ratio of  $PM_{2.5}$  concentrations for households without indoor sources ranges between 68-93%. Here we conduct a sensitivity analysis in which 80% and 95% of the ambient  $PM_{2.5}$  concentrations penetrate into urban and rural households, respectively. Following this hypothesis, the fractional contribution of AAP to total IPWE in 2005 decreases to 27% from the original value of 31%. The contribution of household fuels to IPWE reduction during 2005-2015, i.e., 79 (51 to 113)  $\mu g/m^3$  and 91% (87-94%), is very close to the estimates in this study (76  $\mu g/m^3$  and 90%).

For the calculation of HAP exposure, there has been no continuous nationwide survey of the populations using coal and biomass as their main cooking fuels ( $P_{i,j,k}$  in Eq. 2 of Methods) during 2005-2015, but there are several continuous nationwide statistics/surveys of the consumption of household coal and biomass (see SI Appendix Section 1). The total exposure amount ( $P_{i,j,k} \cdot HAP_{j,k}$  in Eq. 2) for a specific geographic unit, setting (urban or rural), and solid-fuel type is proportional to the solid-fuel consumption, under the assumption that the stove technology remains unchanged over time (influence of this assumption is discussed in the next paragraph). In this study we apply the same HAP exposure levels ( $HAP_{j,k}$  in Eq. 2) to all years because of insufficient measurements to derive  $HAP_{j,k}$  as a function of time. As such,  $P_{i,j,k}$  is proportional to the consumption of solid fuel in the given geographic unit and setting. For this reason, we combine the county-level solid fuel-using populations ( $P_{i,j,k}$ ) in 2010 obtained from the National Population Census (39, 40) with provincial-level statistics of household coal and biomass consumption during 2005-2015 to derive county-level solid fuel-using populations during 2005-2015, as illustrated in SI Appendix Fig. S3. Note that changes in  $HAP_{j,k}$  are affected by not only improvement of stove

technology, but also the changes in fuel mixture and fraction of heating fuels. However, the latter factors do not affect the calculation results of  $PM_{2.5}$  exposure from HAP since the resulting changes in  $HAP_{j,k}$  and  $P_{i,j,k}$  offset each other.

As stated above, we assume that the stove technology remained unchanged during 2005-2015. This may not be the case since the fraction of improved cookstoves could have increased during 2005-2015 driven by improved living standards and possibly a continued influence of the “Improved Stove Program” launched in the 1980s and 1990s (41). There were no such programs for heating stoves, however, until recently. The improvement of stove technology may result in a decrease in  $HAP_{j,k}$ . In this case, the fractional contribution of household fuels to the reduction of IPWE in the last decade could be even larger than our current estimate of 90% (86-93%). The possible changes in  $HAP_{j,k}$  as a result of the stove technology improvement has been reflected in its error bar, which was subsequently used in the Monto Carlo uncertainty analysis.

An assumption that may affect the contribution of household fuels to human health is the relative toxicity of different  $PM_{2.5}$  chemical components. In this study, we hypothesize that the health effects depend only on the inhaled amount of  $PM_{2.5}$  and are independent of the chemical composition, which appears reasonable in view of the available quantitative epidemiological studies. However, some studies have reported that the carbonaceous aerosols could be significantly more toxic than other aerosol species (31, 42). Since carbonaceous aerosols (BC and OC) account for about 75% of the  $PM_{2.5}$  emissions from household-fuel use while contributing only about 27% of  $PM_{2.5}$  emissions from non-household sources, assuming carbonaceous aerosols being more toxic could result in an even larger relative contribution of household fuels to the magnitude and changes of premature deaths, as compared to the results in the present study. Nevertheless, this will not

alter our key conclusion that household fuels were the leading contributor to the decrease in IPWE and associated mortality in 2005-2015.

## **5. Estimation of IPWE attributed to cooking and heating**

As described in Methods, it is not appropriate to separately estimate the HAP exposures due to cooking and space heating based on measured exposure levels, because there were insufficient household measurements supporting this. Therefore, we split the HAP exposure due to cooking and heating based on the assumption that the HAP exposure is proportional to the solid-fuel consumption. The AAP exposure attributed to cooking/heating is quantified by designing a hypothetical scenario in which the household fuels used for cooking/heating are eliminated, and comparing it with the baseline scenario where all sources are included.

In the rural area, the fractions of solid fuels used for cooking and heating in each province are obtained from Tao et al. (12), which quantified the solid-fuel use in rural China from 1992 to 2012 through a national survey. The solid-fuel consumption after 2012 is linearly extrapolated from previous trend. In the urban area, the provincial fractions of solid fuels for cooking and heating are derived from the bottom-up model developed by the Tsinghua University Building Energy Research Center (Tsinghua-BERC) (7-11).

Chen et al. (43) estimated the household PM<sub>2.5</sub> exposure from space heating in rural China, using the difference between the indoor PM<sub>2.5</sub> concentrations in heating and non-heating seasons. They showed that about 24% of the household PM<sub>2.5</sub> exposure in rural China was attributed to space heating, and the fractional contribution remained stable (within  $\pm 1\%$ ) from 2005 to 2012. Based on our estimates, however, the fractional contributions of space heating increased from 23% in 2005 to 31% in 2015, because we accounted for the smaller decreasing rate in heating fuels than in cooking fuels during this period, as described in the main text. Note that Chen et al. (43) only

considered indoor concentrations and not the general ambient air pollution due to household heating. We have adjusted our calculation to be directly comparable to the results of Chen et al. (43).

## **6. Contributors to the changes in premature mortality from 2005 to 2015**

In the main text, we show the trends in PM<sub>2.5</sub>-related premature deaths during 2005-2015, which are the combined effect of changes in IPWE, population, age distribution, and background mortality rate. We take into account all these changes in order to achieve the best possible estimates of the total PM<sub>2.5</sub>-related mortality and the mortality due to household fuels. Here we attempt to isolate the impact of IPWE reduction through a sensitivity analysis in which the population, age distribution, and background mortality rate are kept constant as the 2005 levels. In this case, the PM<sub>2.5</sub>-related mortality is estimated to decrease by 24% (18-30%) from 2005 to 2015, and household fuels contribute 81% (70-89%) of the total mortality reduction, which are similar to the calculation results when changes in all factors are considered (29% and 80%). Therefore, IPWE is the predominant contributor to mortality changes during 2005-2015 at the national level. Nevertheless, the change in population may play an important role in certain regions, such as some large urban centers with rapid increase in migrant population, as illustrated in Fig. 4 and described in the main text.

## **7. Benefits of replacing household solid fuels with clean fuels**

In 2017, an action plan for clean heating (44, 45) was launched in northern China. The target provinces include Beijing, Tianjin, Hebei, Shanxi, Inner Mongolia, Liaoning, Jilin, Heilongjiang, Shandong, Shaanxi, Gansu, Ningxia, Xinjiang, Qinghai, and part of Henan, with a focus on Beijing-Tianjin-Hebei and the surrounding area. The overarching goal is to increase the fraction of clean heating in northern China to 70% by 2021, which means that about 55% of the existing

household solid fuels for heating in these provinces shall be replaced with clean energy, such as natural gas, electricity, combined heat and power with extreme low emissions, solar and geothermal energy, and clean biofuels. While a thorough assessment and comparison of different options is beyond our scope, we aim to illustrate the potential environmental and health benefits that could be achieved through a state-of-the-art control option. For this purpose, we assume that half of the solid fuels are replaced by natural gas and the other half by electricity (50% electric resistance heating and 50% heat pump). As described in the main text, a successful implementation of this policy would reduce the IPWE by 9.7% (8.8-10.4%) in China. The reduction ratio of IPWE is relatively small because the current policy only focuses on household heating fuels (not cooking fuels or non-household sources) in northern China (not middle or southern China). It should be noted that this policy could have co-benefit on the transition in cooking fuels since the rural residents will have easier access to clean fuels after the energy distribution system is constructed or improved. Such co-benefit, however, is difficult to quantify and hence not considered in the calculation. In addition, to evaluate the potential benefits of more stringent controls, we design another scenario in which all solid fuels used for cooking and heating in 2015 were thoroughly replaced with electricity and natural gas (50% each). Following the substitution, the consequent increases in consumption of clean fuels (electricity or natural gas) are calculated according to the assumption that the same amount of useful energy (fuel consumption multiplied by energy efficiency) for both cooking and heating are generated before and after substitution. For cooking, the energy efficiencies of coal stove, biomass stove, natural gas stove, and electric cooking are assumed to be 35%, 17%, 50%, and 90%, respectively (7, 10). With respect to heating, coal stove, biomass stove, natural gas heating, electric resistance heating, and heat pump are assumed to have energy efficiencies of 50%, 24%, 90%, 98%, and 250%, respectively (7, 11, 46). For the electricity

substitution, we assume that the additional household electricity consumption in each province was generated within the same province, considering a transmission loss of 6.6%, the average rate in 2015 (47).

To compare the benefits of substitution by electricity or natural gas, we design two additional scenarios in which all solid fuels used for cooking and heating in 2015 were thoroughly substituted by electricity and natural gas, respectively. In these two scenarios, the fractional reductions in IPWE compared to 2015 would be 63% (57-68%) and 62% (57%-67%), respectively. The corresponding avoided premature deaths are 0.51 (0.40-0.64) million and 0.50 (0.39-0.64) million, respectively. The benefits are very similar because the exposure increase due to additional electricity or natural gas consumption ( $< 0.5 \mu\text{g}/\text{m}^3$ ) are much smaller than the exposure decrease due to reduced solid fuels ( $60 \mu\text{g}/\text{m}^3$ ). Therefore, the choice of natural gas or electricity should not be determined based on the health benefit, but rather based on economic cost, availability of resources, and feasibility of infrastructure construction, which merits further in-depth studies.

In the scenarios, the energy mix and shares of end-of-pipe control technologies of the added power plants are assumed to be same as the existing units in 2015. To evaluate the impact of the energy mix of the added power plants, we design a sensitivity scenario which assumes that all added power plants were coal-fired units. In this case, the electricity substitution was estimated to reduce 62% (57-67%) of the IPWE in 2015 and avoid 0.50 (0.39-0.64) million premature deaths, very similar to our current estimations, i.e., 63% (57-68%) and 0.51 (0.40-0.64) million. The small sensitivity of the environmental and health benefits to the energy mix is also explained by the fact the  $\text{PM}_{2.5}$  exposure increase due to additional power plants is much smaller than the  $\text{PM}_{2.5}$  exposure decrease due to the eliminated household solid fuels. Note that the environmental and health benefits could diminish if the end-of-pipe control measures of the added power plants were not as

stringent as they were in 2015. We suggest this is very unlikely to happen considering the stringent emission standard for power plants in China.

## **8. Comparison with IPWE estimates using the HAP exposure levels from the GBD study**

The HAP exposure levels of solid-fuel users (i.e.,  $HAP_{j,k}$  in Eq. 2 in Methods) are subject to relatively large uncertainties. In the GBD study (48), the parameters derived from in-situ measurements and a prediction model over India were applied to the whole world. The Indian average  $PM_{2.5}$  exposures among all solid fuel-using households (which include the contribution from AAP) were estimated at 285 (95% confidence interval, 201-405)  $\mu g/m^3$  for children, (238-479)  $\mu g/m^3$  for women and 204 (144-290)  $\mu g/m^3$  for men (48). Applying these estimates (the contribution from AAP was subtracted to be consistent with this study), we estimate an IPWE in 2005 of 191 (155-248)  $\mu g/m^3$ , quite similar to the results of the current study (180 (146-219)  $\mu g/m^3$ ). Also, applying the estimates of GBD (48), household fuels are calculated to lead to a reduction of 77 (50-119)  $\mu g/m^3$  in IPWE from 2005 to 2015, representing 91% (87-94%) of the total IPWE reduction, which is also similar to the estimates in the current study (76  $\mu g/m^3$  and 90%).

## References

1. Zhao B, *et al.* (2013) NO<sub>x</sub> emissions in China: historical trends and future perspectives. *Atmos Chem Phys* 13(19):9869-9897.
2. Wang SX, *et al.* (2014) Emission trends and mitigation options for air pollutants in East Asia. *Atmos Chem Phys* 14(13):6571-6603.
3. Zhao B, *et al.* (2013) Impact of national NO<sub>x</sub> and SO<sub>2</sub> control policies on particulate matter pollution in China. *Atmos Environ* 77:453-463.
4. Cai SY, *et al.* (2017) The impact of the "Air Pollution Prevention and Control Action Plan" on PM<sub>2.5</sub> concentrations in Jing-Jin-Ji region during 2012-2020. *Sci Total Environ* 580:197-209.
5. Fu X, *et al.* (2017) Increasing Ammonia Concentrations Reduce the Effectiveness of Particle Pollution Control Achieved via SO<sub>2</sub> and NO<sub>x</sub> Emissions Reduction in East China. *Environmental Science & Technology Letters* 4(6):221-227.
6. National Bureau of Statistics (NBS) (2016) *China Energy Statistical Yearbook 2016* (China Statistics Press, Beijing).
7. Tsinghua University Building Energy Research Center (Tsinghua-BERC) (2009) *2009 Annual Report on China Building Energy Efficiency* (China Architecture & Building Press, Beijing).
8. Tsinghua University Building Energy Research Center (Tsinghua-BERC) (2013) *2013 Annual Report on China Building Energy Efficiency* (China Architecture & Building Press, Beijing).
9. Tsinghua University Building Energy Research Center (Tsinghua-BERC) (2015) *2015 Annual Report on China Building Energy Efficiency* (China Architecture & Building Press, Beijing).
10. Tsinghua University Building Energy Research Center (Tsinghua-BERC) (2016) *2016 Annual Report on China Building Energy Efficiency* (China Architecture & Building Press, Beijing).
11. Tsinghua University Building Energy Research Center (Tsinghua-BERC) (2017) *2017 Annual Report on China Building Energy Efficiency* (China Architecture & Building Press, Beijing).
12. Tao S, *et al.* (2018) Quantifying the rural residential energy transition in China from 1992 to 2012 through a representative national survey. *Nature Energy*.
13. National Bureau of Statistics (NBS) (2008) *China Energy Statistical Yearbook 2008* (China Statistics Press, Beijing).
14. International Energy Agency (2017) Country-specific Energy statistics, available at <https://www.iea.org/statistics/statisticssearch/>.
15. Zhao B, *et al.* (2016) Quantifying the effect of organic aerosol aging and intermediate-volatility emissions on regional-scale aerosol pollution in China. *Sci Rep-Uk* 6:28815.
16. Zhao B, *et al.* (2017) A modeling study of the nonlinear response of fine particles to air pollutant emissions in the Beijing-Tianjin-Hebei region. *Atmos Chem Phys* 17:12031-12050.
17. Emery C, Tai E, & Yarwood G (2001) Enhanced meteorological modeling and performance evaluation for two Texas episodes. Report to the Texas Natural Resources Conservation Commission. (ENVIRON, International Corp, Novato, CA).
18. Heald CL (2010) GEOS-Chem Aerosol Optics, available at [http://www.atmos.colostate.edu/~heald/docs/GEOS\\_Chem\\_optics\\_description.pdf](http://www.atmos.colostate.edu/~heald/docs/GEOS_Chem_optics_description.pdf).

19. Martin R & Heald CL (2010) Aerosol optical properties update for GEOS-Chem v8-03-01, available at [http://wiki.seas.harvard.edu/geos-chem/index.php/Aerosol\\_optical\\_properties](http://wiki.seas.harvard.edu/geos-chem/index.php/Aerosol_optical_properties).
20. Zhang Y, *et al.* (2016) Application of WRF/Chem over East Asia: Part I. Model evaluation and intercomparison with MM5/CMAQ. *Atmos Environ* 124:285-300.
21. Zhao B, *et al.* (2017) Enhanced PM2.5 pollution in China due to aerosol-cloud interactions. *Sci Rep-Uk* 7:4453.
22. Yu S, Eder B, Dennis R, Chu SH, & Schwartz SE (2006) New unbiased symmetric metrics for evaluation of air quality models. *Atmospheric Science Letters* 7(1):26-34.
23. Boylan JW & Russell AG (2006) PM and light extinction model performance metrics, goals, and criteria for three-dimensional air quality models. *Atmos Environ* 40:4946-4959.
24. Liu X-H, *et al.* (2010) Understanding of regional air pollution over China using CMAQ, part I performance evaluation and seasonal variation. *Atmos Environ* 44(20):2415-2426.
25. Wang SX, *et al.* (2011) Verification of anthropogenic emissions of China by satellite and ground observations. *Atmos Environ* 45(35):6347-6358.
26. Zhao B, *et al.* (2013) Environmental effects of the recent emission changes in China: implications for particulate matter pollution and soil acidification. *Environ Res Lett* 8(2):024031.
27. Shen HZ, *et al.* (2013) Global Atmospheric Emissions of Polycyclic Aromatic Hydrocarbons from 1960 to 2008 and Future Predictions. *Environ Sci Technol* 47(12):6415-6424.
28. Shen HZ, *et al.* (2017) Urbanization-induced population migration has reduced ambient PM2.5 concentrations in China. *Sci Adv* 3(7).
29. Aunan K, Ma Q, Lund MT, & Wang SX (2018) Population-weighted exposure to PM2.5 pollution in China: An integrated approach. *Environ Int* 120:111-120.
30. Cohen AJ, *et al.* (2017) Estimates and 25-year trends of the global burden of disease attributable to ambient air pollution: an analysis of data from the Global Burden of Diseases Study 2015. *Lancet* 389(10082):1907-1918.
31. Lelieveld J, Evans JS, Fnais M, Giannadaki D, & Pozzer A (2015) The contribution of outdoor air pollution sources to premature mortality on a global scale. *Nature* 525(7569):367-+.
32. GBD MAPS Working Group (2018) Burden of Disease Attributable to Major Air Pollution Sources in India (Special Report 21). (Health Effects Institute, Boston, Massachusetts, USA).
33. Wang SX, Wei W, Li D, Aunan K, & Hao JM (2010) Air pollutants in rural homes in Guizhou, China - Concentrations, speciation, and size distribution. *Atmos Environ* 44(36):4575-4581.
34. Chen RJ, *et al.* (2015) Cardiopulmonary Benefits of Reducing Indoor Particles of Outdoor Origin. *J Am Coll Cardiol* 65(21):2279-2287.
35. Meng QY, *et al.* (2005) Influence of ambient (outdoor) sources on residential indoor and personal PM2.5 concentrations: Analyses of RIOPA data. *Journal Of Exposure Analysis And Environmental Epidemiology* 15(1):17-28.
36. Guo H, *et al.* (2010) Characterization of particle number concentrations and PM2.5 in a school: influence of outdoor air pollution on indoor air. *Environ Sci Pollut R* 17(6):1268-1278.

37. Zhou ZH, *et al.* (2016) Indoor PM<sub>2.5</sub> concentrations in residential buildings during a severely polluted winter: A case study in Tianjin, China. *Renew Sust Energ Rev* 64:372-381.
38. Qi M, *et al.* (2017) Exposure and health impact evaluation based on simultaneous measurement of indoor and ambient PM<sub>2.5</sub> in Haidian, Beijing. *Environ Pollut* 220:704-712.
39. National Bureau of Statistics (NBS) (2012) *Tabulation of the 2010 Population Census of the People's Republic of China* (China Statistics Press, Beijing).
40. ACMR (2015) China 2010 County Population Census Data with GIS Maps, available at <https://chinadatacenter.org/Data/Services.aspx>. (All China Marketing Research Co. Ltd).
41. The World Bank (2013) China: Accelerating Household Access to Clean Cooking and Heating, available at <https://openknowledge.worldbank.org/handle/10986/16662>. (The World Bank Group Asia Sustainable and Alternative Energy Program, Washington, DC, USA).
42. Tuomisto JT, Wilson A, Evans JS, & Tainio M (2008) Uncertainty in mortality response to airborne fine particulate matter: Combining European air pollution experts. *Reliability Engineering & System Safety* 93(5):732-744.
43. Chen Y, *et al.* (2018) Estimating household air pollution exposures and health impacts from space heating in rural China. *Environ Int* 119:117-124.
44. Ministry of Environmental Protection of China (2017) Work plan for air pollution control in Beijing-Tianjin-Hebei and its surrounding areas in 2017, available at [http://dqhj.mep.gov.cn/dtxx/201703/t20170323\\_408663.shtml](http://dqhj.mep.gov.cn/dtxx/201703/t20170323_408663.shtml). (Beijing, China).
45. National Development and Reform Commission of China (2017) Work plan for clean heating in winter in northern China (2017-2021), available at [http://www.gov.cn/xinwen/2017-12/20/content\\_5248855.htm](http://www.gov.cn/xinwen/2017-12/20/content_5248855.htm). (Beijing, China).
46. Li Q, *et al.* (2016) Improving the Energy Efficiency of Stoves To Reduce Pollutant Emissions from Household Solid Fuel Combustion in China. *Environmental Science & Technology Letters* 3(10):369-374.
47. China Electric Power Yearbook Committee (2017) *China Electric Power Yearbook 2016* (China Electric Power Press, Beijing, China).
48. Smith KR, *et al.* (2014) Millions Dead: How Do We Know and What Does It Mean? Methods Used in the Comparative Risk Assessment of Household Air Pollution. *Annual Review of Public Health, Vol 35*, Annual Review of Public Health, ed Fielding JE), Vol 35, pp 185-206.

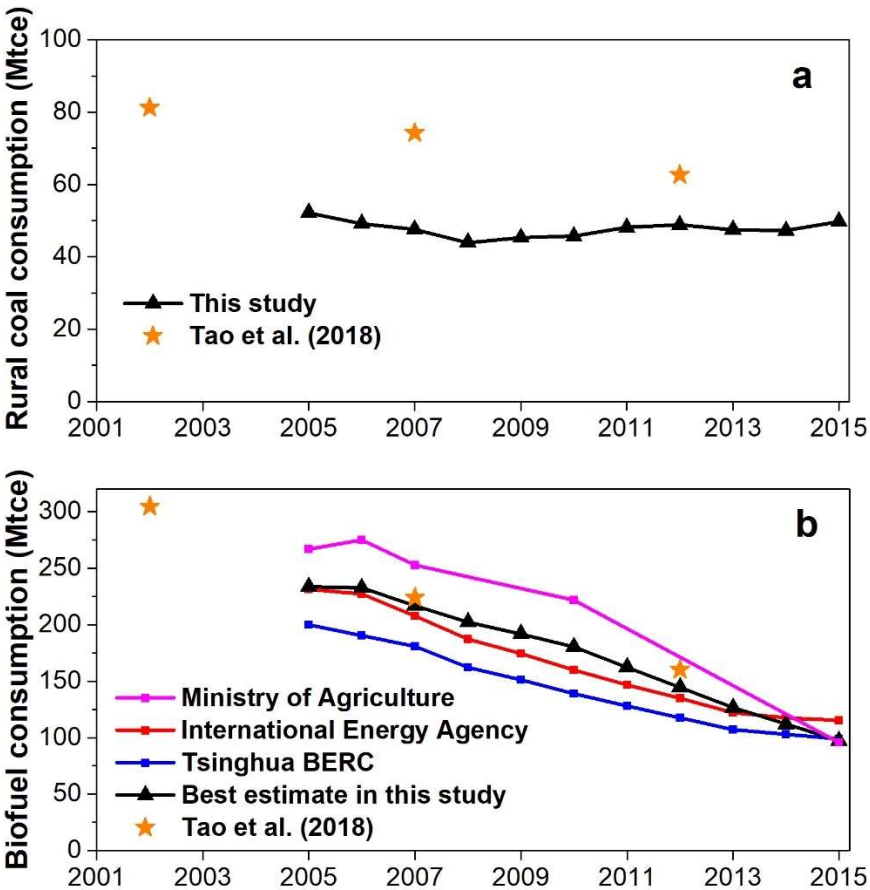

442  
443 **Figure S1.** Household coal and biomass consumption from different nationwide statistics and  
444 surveys. The data sources are described in SI Appendix Section 1. The values of “best estimate in  
445 this study” in (b) are derived by taking the average of the data from the Ministry of Agriculture  
446 and Tsinghua-BERC, which are bottom-up statistical or survey data compiled by local institutes.

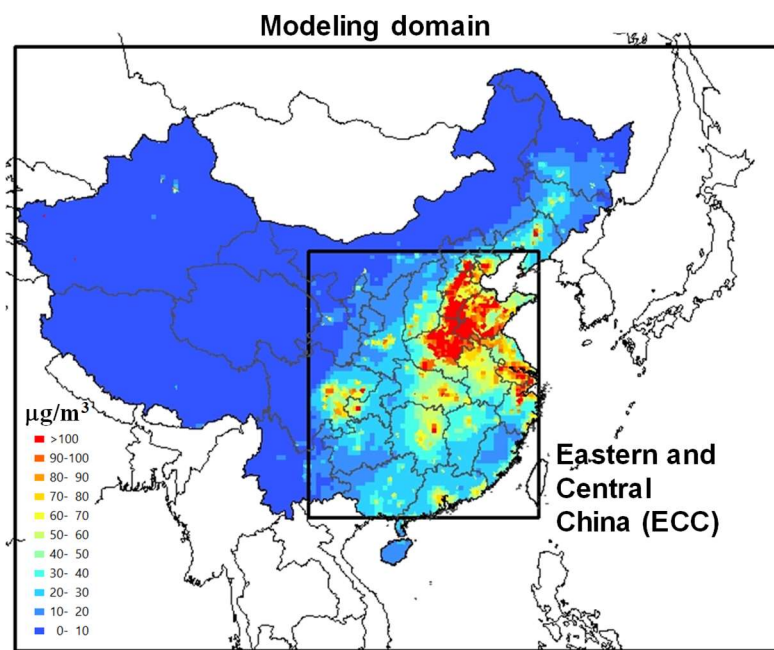

**Figure S2.** Modeling domain used in this study. The inner black box denotes the Eastern and Central China (ECC), which covers most of the populous areas in China characterized by substantial anthropogenic emissions and high ambient PM<sub>2.5</sub> concentrations. The colors represent ambient PM<sub>2.5</sub> concentrations in 2005, which are the same as Fig. 1c.

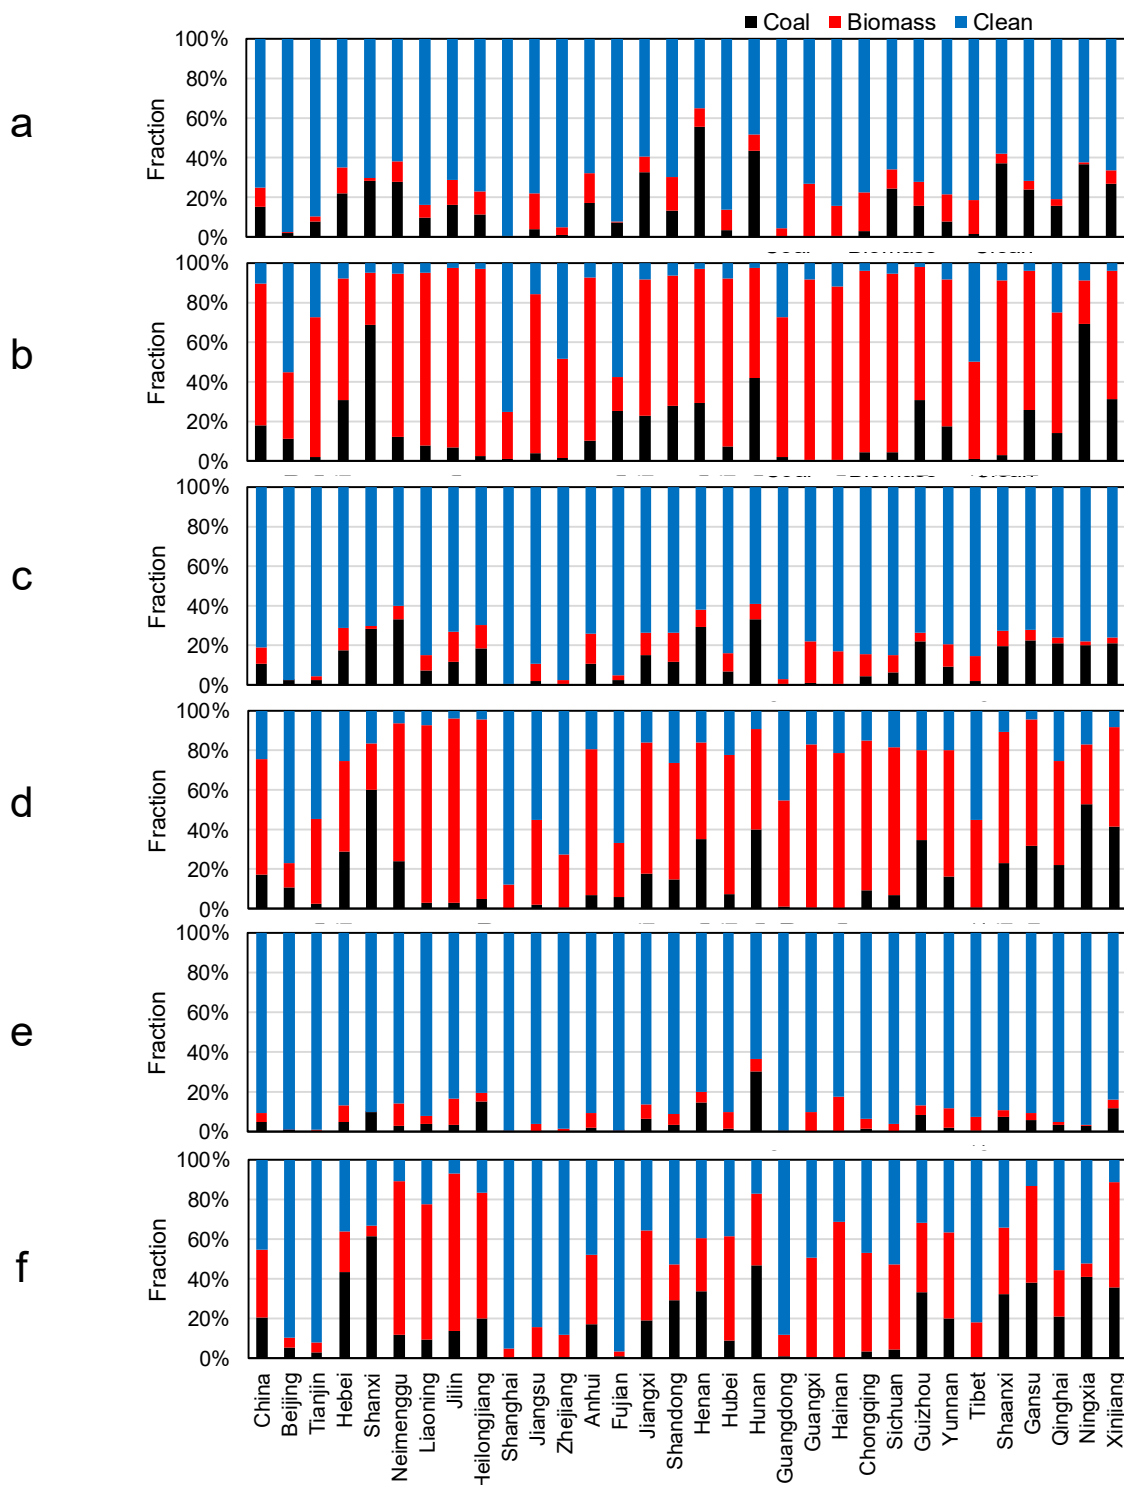

**Figure S3.** Share of major cooking fuels among urban and rural populations by province in 2005 and 2015: **a**, urban, 2005; **b**, rural, 2005; **c**, urban, 2010; **d**, rural, 2010; **e**, urban, 2015; **f**, rural, 2015. “Clean” refers to electricity and gaseous fuels (natural gas, liquified petroleum gas, coal gas, and biogas).

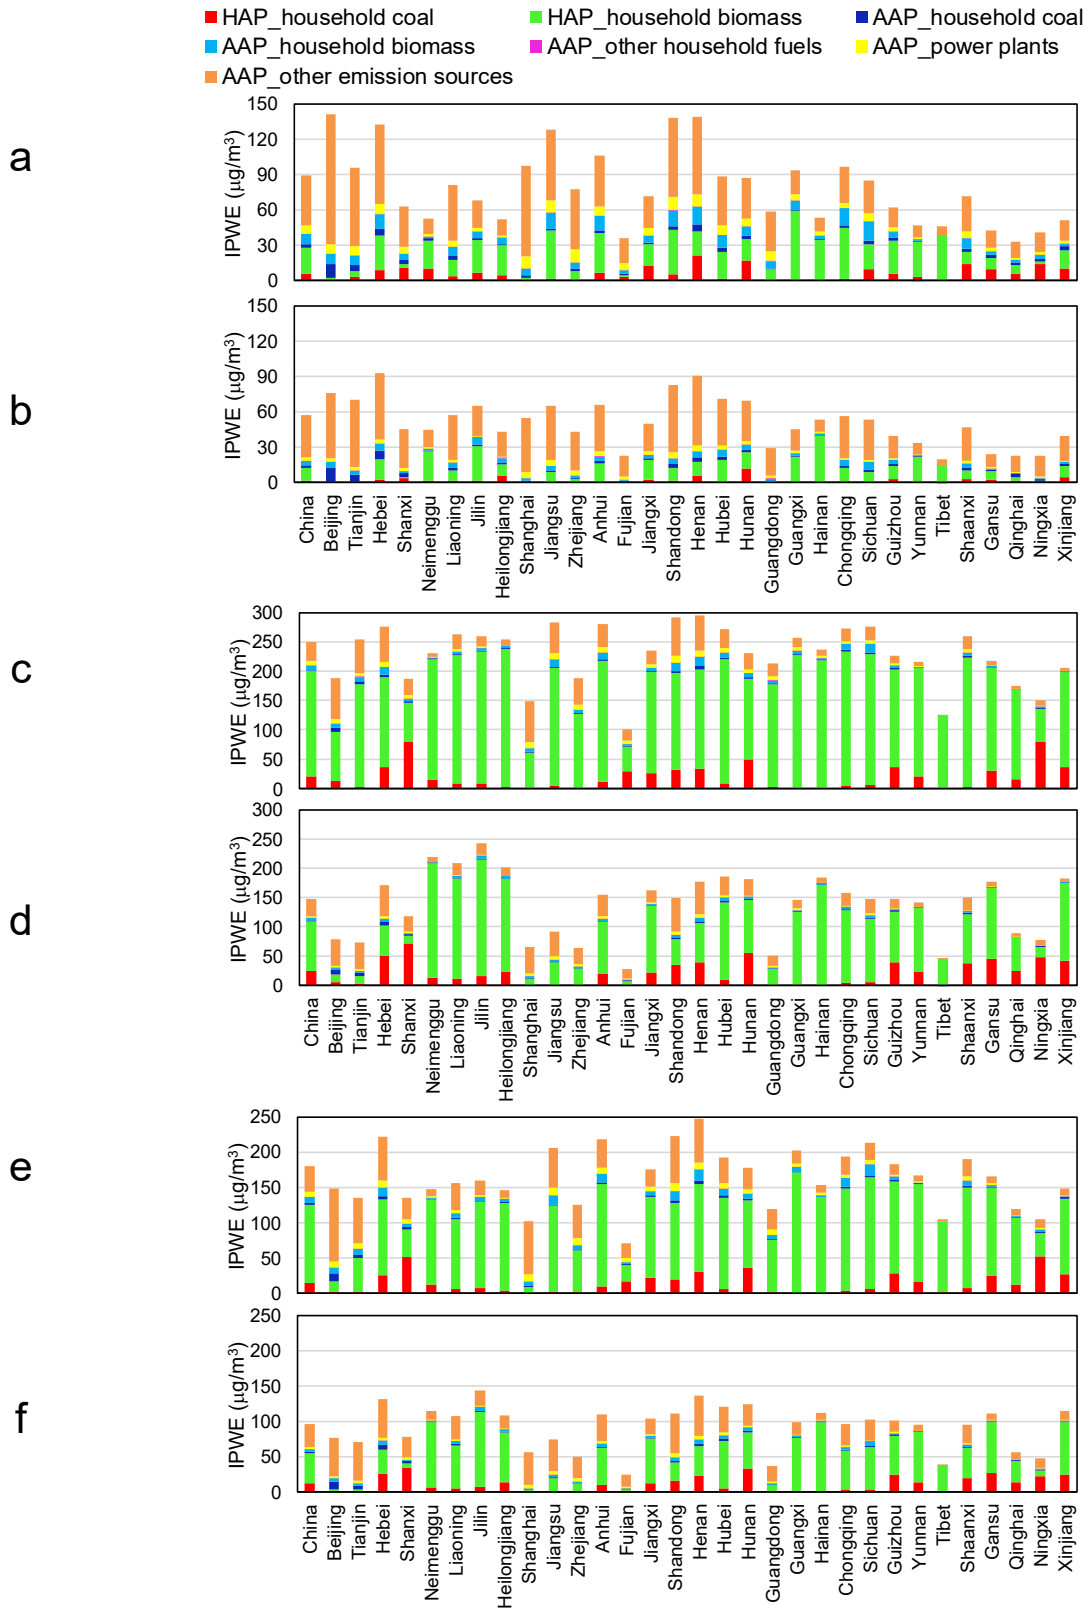

**Figure S4.** Contribution of individual sources to IPWE among urban (a, b), rural (c, d), and all (e, f) populations in 2005 (a, c, e) and 2015 (b, d, f).

458 **Table S1.** Emissions of major air pollutants by sector in China during 2005-2015 (kt).

459 (a) SO<sub>2</sub>

|                          | 2005  | 2006  | 2007  | 2008  | 2009  | 2010  | 2011  | 2012  | 2013  | 2014  | 2015  |
|--------------------------|-------|-------|-------|-------|-------|-------|-------|-------|-------|-------|-------|
| Power plants             | 15414 | 13703 | 11562 | 8446  | 6546  | 6272  | 6919  | 6914  | 6223  | 4886  | 4578  |
| Industrial combustion    | 6580  | 7099  | 7508  | 8819  | 9266  | 9482  | 9728  | 9683  | 6997  | 4595  | 5439  |
| Industrial process       | 4599  | 5090  | 5529  | 5184  | 5359  | 6216  | 6174  | 5993  | 6565  | 5625  | 3735  |
| Cement                   | 1246  | 1357  | 1404  | 1218  | 1120  | 1326  | 1433  | 1540  | 1704  | 1131  | 927   |
| Steel                    | 1222  | 1431  | 1744  | 1830  | 2002  | 2515  | 2278  | 2062  | 2286  | 1742  | 768   |
| Residential & commercial | 2403  | 2352  | 2289  | 2763  | 2977  | 3123  | 3390  | 3569  | 3379  | 3438  | 3598  |
| Household coal           | 1269  | 1205  | 1173  | 1143  | 1159  | 1199  | 1245  | 1232  | 1099  | 1096  | 1128  |
| Household biomass        | 82    | 82    | 76    | 71    | 67    | 63    | 57    | 51    | 44    | 39    | 34    |
| Other household fuels    | 15    | 15    | 18    | 19    | 20    | 22    | 23    | 26    | 23    | 24    | 25    |
| Transportation           | 499   | 484   | 469   | 460   | 443   | 434   | 381   | 321   | 268   | 224   | 167   |
| On-road                  | 272   | 243   | 215   | 186   | 158   | 130   | 108   | 86    | 64    | 42    | 20    |
| Off-road                 | 228   | 241   | 254   | 274   | 285   | 304   | 273   | 236   | 204   | 181   | 146   |
| Biomass open burning     | 84    | 86    | 84    | 87    | 85    | 86    | 88    | 91    | 90    | 91    | 86    |
| Total                    | 29579 | 28814 | 27441 | 25759 | 24677 | 25613 | 26679 | 26571 | 23522 | 18859 | 17603 |

460

461 (b) NO<sub>x</sub>

|                          | 2005  | 2006  | 2007  | 2008  | 2009  | 2010  | 2011  | 2012  | 2013  | 2014  | 2015  |
|--------------------------|-------|-------|-------|-------|-------|-------|-------|-------|-------|-------|-------|
| Power plants             | 7180  | 7829  | 8405  | 8238  | 8036  | 8156  | 8330  | 8026  | 7960  | 5563  | 4020  |
| Industrial combustion    | 3133  | 3445  | 3673  | 4073  | 4195  | 4550  | 4484  | 4401  | 3372  | 2791  | 2312  |
| Industrial process       | 2752  | 3102  | 3507  | 3857  | 4444  | 5043  | 5247  | 5446  | 5960  | 5038  | 4702  |
| Cement                   | 1088  | 1282  | 1506  | 1673  | 2001  | 2358  | 2519  | 2676  | 2922  | 2163  | 1934  |
| Steel                    | 274   | 324   | 399   | 423   | 466   | 592   | 563   | 535   | 546   | 603   | 555   |
| Residential & commercial | 966   | 948   | 892   | 933   | 945   | 943   | 965   | 959   | 882   | 851   | 852   |
| Household coal           | 199   | 184   | 175   | 166   | 167   | 172   | 179   | 175   | 159   | 154   | 157   |
| Household biomass        | 539   | 537   | 500   | 467   | 443   | 416   | 375   | 334   | 292   | 258   | 225   |
| Other household fuels    | 5     | 5     | 6     | 6     | 7     | 7     | 8     | 9     | 8     | 8     | 9     |
| Transportation           | 5940  | 6170  | 6546  | 6907  | 7763  | 8780  | 9255  | 9404  | 10162 | 10180 | 10204 |
| On-road                  | 4052  | 4177  | 4441  | 4666  | 5468  | 6382  | 6950  | 7268  | 7747  | 7793  | 7735  |
| Off-road                 | 1888  | 1992  | 2105  | 2241  | 2295  | 2398  | 2305  | 2136  | 2416  | 2387  | 2469  |
| Biomass open burning     | 493   | 502   | 489   | 506   | 499   | 503   | 516   | 529   | 527   | 530   | 502   |
| Total                    | 20463 | 21996 | 23512 | 24514 | 25883 | 27974 | 28797 | 28765 | 28863 | 24953 | 22591 |

462

463 (c) PM<sub>10</sub>

|                          | 2005 | 2006 | 2007 | 2008 | 2009 | 2010 | 2011 | 2012 | 2013 | 2014 | 2015 |
|--------------------------|------|------|------|------|------|------|------|------|------|------|------|
| Power plants             | 1951 | 1842 | 1709 | 1424 | 1253 | 1261 | 1275 | 1123 | 1114 | 1055 | 1084 |
| Industrial combustion    | 1518 | 1585 | 1586 | 1713 | 1692 | 1696 | 1791 | 1847 | 1292 | 1214 | 1337 |
| Industrial process       | 8454 | 8484 | 8217 | 7606 | 6921 | 6856 | 6977 | 7068 | 7344 | 5421 | 3940 |
| Cement                   | 4944 | 4718 | 4200 | 3358 | 2999 | 2796 | 2897 | 2980 | 2985 | 1990 | 1264 |
| Steel                    | 958  | 1077 | 1222 | 1190 | 1262 | 1350 | 1336 | 1320 | 1397 | 1277 | 1206 |
| Residential & commercial | 4615 | 4555 | 4282 | 4302 | 4243 | 4121 | 4067 | 3857 | 3577 | 3361 | 3253 |
| Household coal           | 666  | 618  | 586  | 556  | 560  | 576  | 599  | 586  | 532  | 518  | 527  |
| Household biomass        | 3362 | 3348 | 3120 | 2911 | 2760 | 2596 | 2337 | 2080 | 1822 | 1611 | 1402 |
| Other household fuels    | 6    | 7    | 8    | 8    | 9    | 10   | 10   | 11   | 10   | 11   | 11   |
| Transportation           | 756  | 738  | 756  | 754  | 802  | 829  | 790  | 720  | 697  | 642  | 578  |
| On-road                  | 443  | 410  | 411  | 405  | 458  | 502  | 492  | 462  | 454  | 416  | 375  |
| Off-road                 | 313  | 328  | 344  | 349  | 344  | 327  | 298  | 257  | 244  | 225  | 203  |
| Biomass open burning     | 1634 | 1664 | 1621 | 1677 | 1653 | 1666 | 1711 | 1756 | 1748 | 1758 | 1666 |

464

|       |       |       |       |       |       |       |       |       |       |       |       |
|-------|-------|-------|-------|-------|-------|-------|-------|-------|-------|-------|-------|
| Total | 18927 | 18869 | 18171 | 17476 | 16563 | 16428 | 16611 | 16370 | 15773 | 13451 | 11859 |
|-------|-------|-------|-------|-------|-------|-------|-------|-------|-------|-------|-------|

465 (d) PM<sub>2.5</sub>

|                          | 2005  | 2006  | 2007  | 2008  | 2009  | 2010  | 2011  | 2012  | 2013  | 2014 | 2015 |
|--------------------------|-------|-------|-------|-------|-------|-------|-------|-------|-------|------|------|
| Power plants             | 1177  | 1114  | 1040  | 872   | 767   | 767   | 769   | 693   | 664   | 628  | 648  |
| Industrial combustion    | 963   | 1018  | 1033  | 1131  | 1135  | 1160  | 1217  | 1274  | 870   | 807  | 888  |
| Industrial process       | 5185  | 5252  | 5146  | 4791  | 4335  | 4326  | 4444  | 4545  | 4712  | 3495 | 2506 |
| Cement                   | 3152  | 3008  | 2679  | 2143  | 1911  | 1777  | 1835  | 1881  | 1867  | 1168 | 698  |
| Steel                    | 724   | 811   | 918   | 892   | 941   | 999   | 985   | 969   | 1029  | 926  | 872  |
| Residential & commercial | 3992  | 3942  | 3690  | 3557  | 3447  | 3312  | 3141  | 2911  | 2624  | 2413 | 2252 |
| Household coal           | 518   | 481   | 456   | 432   | 435   | 448   | 466   | 456   | 414   | 403  | 410  |
| Household biomass        | 3257  | 3244  | 3022  | 2820  | 2674  | 2514  | 2264  | 2015  | 1765  | 1561 | 1358 |
| Other household fuels    | 6     | 7     | 8     | 8     | 9     | 10    | 10    | 11    | 10    | 11   | 11   |
| Transportation           | 695   | 700   | 716   | 714   | 760   | 761   | 748   | 682   | 660   | 608  | 548  |
| On-road                  | 399   | 389   | 390   | 383   | 434   | 451   | 466   | 438   | 430   | 394  | 355  |
| Off-road                 | 296   | 311   | 326   | 331   | 326   | 310   | 282   | 244   | 231   | 214  | 193  |
| Biomass open burning     | 1348  | 1372  | 1337  | 1383  | 1363  | 1374  | 1411  | 1448  | 1442  | 1450 | 1374 |
| Total                    | 13359 | 13398 | 12963 | 12449 | 11806 | 11701 | 11731 | 11553 | 10973 | 9401 | 8217 |

466

467 (e) BC

|                          | 2005 | 2006 | 2007 | 2008 | 2009 | 2010 | 2011 | 2012 | 2013 | 2014 | 2015 |
|--------------------------|------|------|------|------|------|------|------|------|------|------|------|
| Power plants             | 46   | 41   | 37   | 28   | 19   | 14   | 15   | 10   | 8    | 8    | 9    |
| Industrial combustion    | 157  | 164  | 165  | 179  | 176  | 176  | 181  | 186  | 123  | 108  | 118  |
| Industrial process       | 477  | 515  | 537  | 629  | 502  | 512  | 520  | 527  | 536  | 393  | 207  |
| Cement                   | 11   | 11   | 11   | 10   | 10   | 10   | 11   | 11   | 11   | 6    | 5    |
| Steel                    | 20   | 23   | 27   | 26   | 30   | 32   | 33   | 35   | 38   | 38   | 37   |
| Residential & commercial | 871  | 851  | 798  | 770  | 752  | 732  | 710  | 667  | 603  | 563  | 537  |
| Household coal           | 259  | 240  | 228  | 216  | 218  | 224  | 233  | 228  | 207  | 201  | 205  |
| Household biomass        | 570  | 568  | 529  | 494  | 468  | 440  | 396  | 353  | 309  | 273  | 238  |
| Other household fuels    | 1    | 1    | 1    | 1    | 1    | 1    | 1    | 1    | 1    | 1    | 1    |
| Transportation           | 385  | 388  | 397  | 396  | 421  | 423  | 415  | 378  | 365  | 337  | 303  |
| On-road                  | 216  | 211  | 211  | 208  | 235  | 247  | 255  | 239  | 234  | 215  | 193  |
| Off-road                 | 169  | 177  | 186  | 188  | 186  | 177  | 161  | 139  | 132  | 122  | 110  |
| Biomass open burning     | 54   | 55   | 54   | 56   | 55   | 56   | 57   | 59   | 58   | 59   | 56   |
| Total                    | 1991 | 2014 | 1989 | 2058 | 1924 | 1913 | 1899 | 1827 | 1694 | 1467 | 1231 |

468

469 (f) OC

|                          | 2005 | 2006 | 2007 | 2008 | 2009 | 2010 | 2011 | 2012 | 2013 | 2014 | 2015 |
|--------------------------|------|------|------|------|------|------|------|------|------|------|------|
| Power plants             | 13   | 12   | 12   | 10   | 8    | 8    | 9    | 12   | 13   | 13   | 17   |
| Industrial combustion    | 38   | 40   | 41   | 43   | 43   | 47   | 47   | 48   | 34   | 31   | 33   |
| Industrial process       | 416  | 446  | 462  | 524  | 437  | 445  | 448  | 450  | 459  | 327  | 184  |
| Cement                   | 34   | 34   | 33   | 29   | 30   | 31   | 32   | 34   | 34   | 19   | 14   |
| Steel                    | 37   | 42   | 46   | 45   | 48   | 49   | 46   | 44   | 48   | 44   | 40   |
| Residential & commercial | 2009 | 1987 | 1856 | 1739 | 1662 | 1580 | 1452 | 1313 | 1158 | 1042 | 936  |
| Household coal           | 207  | 192  | 182  | 173  | 174  | 179  | 186  | 182  | 166  | 161  | 164  |
| Household biomass        | 1791 | 1784 | 1662 | 1551 | 1471 | 1383 | 1245 | 1108 | 971  | 858  | 747  |
| Other household fuels    | 2    | 2    | 2    | 3    | 3    | 3    | 3    | 3    | 3    | 3    | 3    |
| Transportation           | 130  | 131  | 134  | 134  | 142  | 142  | 140  | 128  | 124  | 114  | 103  |
| On-road                  | 77   | 75   | 75   | 74   | 84   | 86   | 89   | 84   | 83   | 75   | 68   |

|                      |      |      |      |      |      |      |      |      |      |      |      |
|----------------------|------|------|------|------|------|------|------|------|------|------|------|
| Off-road             | 53   | 56   | 59   | 60   | 59   | 56   | 51   | 44   | 42   | 38   | 35   |
| Biomass open burning | 539  | 549  | 535  | 553  | 545  | 550  | 564  | 579  | 577  | 580  | 550  |
| Total                | 3145 | 3165 | 3039 | 3003 | 2838 | 2771 | 2661 | 2528 | 2365 | 2106 | 1823 |

470

471 (g) NMVOC

|                          | 2005  | 2006  | 2007  | 2008  | 2009  | 2010  | 2011  | 2012  | 2013  | 2014  | 2015  |
|--------------------------|-------|-------|-------|-------|-------|-------|-------|-------|-------|-------|-------|
| Industrial combustion    | 69    | 76    | 83    | 87    | 93    | 107   | 113   | 119   | 119   | 125   | 129   |
| Industrial process       | 4020  | 4629  | 5193  | 5434  | 5522  | 5912  | 6000  | 6054  | 7048  | 6858  | 6037  |
| Residential & commercial | 4628  | 4559  | 4204  | 4003  | 3845  | 3664  | 3421  | 3142  | 2798  | 2544  | 2344  |
| Household coal           | 476   | 441   | 419   | 397   | 400   | 411   | 428   | 419   | 380   | 369   | 375   |
| Household biomass        | 3913  | 3875  | 3540  | 3282  | 3091  | 2887  | 2578  | 2274  | 1974  | 1728  | 1489  |
| Other household fuels    | 40    | 41    | 46    | 46    | 47    | 48    | 54    | 55    | 48    | 47    | 52    |
| Transportation           | 5199  | 5454  | 5914  | 5888  | 5758  | 5403  | 5696  | 6027  | 6155  | 6403  | 6677  |
| On-road                  | 4359  | 4568  | 4987  | 4940  | 4807  | 4451  | 4764  | 5142  | 5286  | 5555  | 5843  |
| Off-road                 | 841   | 885   | 928   | 948   | 951   | 952   | 932   | 885   | 869   | 848   | 834   |
| Biomass open burning     | 1135  | 1156  | 1165  | 1148  | 1148  | 1157  | 1188  | 1219  | 1214  | 1147  | 1030  |
| Solvent use              | 3697  | 4349  | 4935  | 5219  | 6249  | 7480  | 7818  | 8155  | 8155  | 8599  | 9043  |
| Other sources            | 193   | 207   | 228   | 255   | 255   | 256   | 307   | 358   | 387   | 394   | 432   |
| Total                    | 18941 | 20428 | 21722 | 22034 | 22870 | 23979 | 24543 | 25075 | 25877 | 26070 | 25692 |

472

473 (h) NH<sub>3</sub>

|                        | 2005  | 2006  | 2007 | 2008 | 2009  | 2010  | 2011  | 2012  | 2013  | 2014  | 2015  |
|------------------------|-------|-------|------|------|-------|-------|-------|-------|-------|-------|-------|
| Livestock              | 5882  | 5981  | 4981 | 5194 | 5405  | 5538  | 5508  | 5717  | 5803  | 5928  | 5657  |
| fertilizer application | 3682  | 3772  | 3746 | 3728 | 3800  | 3826  | 3852  | 3871  | 3843  | 3815  | 3769  |
| Industrial process     | 239   | 247   | 266  | 272  | 282   | 275   | 270   | 301   | 302   | 288   | 308   |
| Other sources          | 621   | 618   | 617  | 624  | 635   | 642   | 657   | 666   | 680   | 684   | 698   |
| Total                  | 10425 | 10618 | 9610 | 9819 | 10122 | 10281 | 10287 | 10555 | 10627 | 10714 | 10432 |

474

475 **Table S2.** Performance statistics for the comparison between simulated and observed meteorological variables.

|                     | Wind speed  |             |                |          |          |            | Temperature |             |                          |          |      |            | Humidity    |             |              |          |      |            |
|---------------------|-------------|-------------|----------------|----------|----------|------------|-------------|-------------|--------------------------|----------|------|------------|-------------|-------------|--------------|----------|------|------------|
|                     | Mean<br>OBS | Mean<br>SIM | MB             | GE       | RMSE     | IOA        | Mean<br>OBS | Mean<br>SIM | MB                       | GE       | RMSE | IOA        | Mean<br>OBS | Mean<br>SIM | MB           | GE       | RMSE | IOA        |
| Unit                | m/s         | m/s         | m/s            | m/s      | m/s      |            | K           | K           | K                        | K        | K    |            | g/kg        | g/kg        | g/kg         | g/kg     | g/kg |            |
| Benchmark           |             |             | $\leq \pm 0.5$ | $\leq 2$ | $\leq 2$ | $\geq 0.6$ |             |             | $\leq \pm 0.5$           | $\leq 2$ |      | $\geq 0.8$ |             |             | $\leq \pm 1$ | $\leq 2$ |      | $\geq 0.6$ |
| Spr-05 <sup>a</sup> | 3.43        | 3.23        | -0.20          | 1.32     | 1.82     | 0.77       | 283.3       | 283.0       | -0.32                    | 1.62     | 2.25 | 0.98       | 4.62        | 4.61        | -0.01        | 0.78     | 1.06 | 0.98       |
| Sum-05              | 2.74        | 2.57        | -0.17          | 1.16     | 1.64     | 0.71       | 296.0       | 295.8       | -0.20                    | 1.53     | 2.07 | 0.97       | 11.61       | 10.77       | -0.84        | 1.63     | 2.12 | 0.95       |
| Fal-05              | 2.70        | 2.65        | -0.05          | 1.12     | 1.57     | 0.76       | 283.4       | 283.0       | -0.39                    | 1.50     | 2.00 | 0.98       | 5.68        | 5.42        | -0.26        | 0.85     | 1.17 | 0.97       |
| Win-05              | 2.73        | 2.77        | 0.04           | 1.19     | 1.65     | 0.74       | 264.8       | 264.3       | -0.44                    | 1.91     | 2.73 | 0.98       | 1.89        | 1.93        | 0.05         | 0.32     | 0.50 | 0.98       |
| Spr-10              | 3.08        | 3.02        | -0.06          | 1.22     | 1.72     | 0.78       | 285.8       | 285.3       | -0.43                    | 1.68     | 2.51 | 0.98       | 6.55        | 6.58        | 0.03         | 0.92     | 1.28 | 0.98       |
| Sum-10              | 2.50        | 2.38        | -0.12          | 1.06     | 1.51     | 0.74       | 297.2       | 296.8       | -0.42                    | 1.61     | 2.31 | 0.97       | 13.47       | 12.91       | -0.56        | 1.61     | 2.14 | 0.96       |
| Fal-10              | 2.52        | 2.53        | 0.01           | 1.05     | 1.48     | 0.80       | 287.1       | 286.6       | -0.48                    | 1.60     | 2.30 | 0.98       | 8.07        | 7.73        | -0.34        | 1.07     | 1.46 | 0.97       |
| Win-10              | 2.78        | 2.86        | 0.08           | 1.18     | 1.67     | 0.78       | 274.4       | 273.8       | <b>-0.56<sup>b</sup></b> | 1.86     | 2.78 | 0.99       | 3.57        | 3.68        | 0.11         | 0.59     | 0.87 | 0.98       |
| Spr-15              | 2.97        | 2.88        | -0.09          | 1.21     | 1.67     | 0.78       | 287.4       | 286.8       | <b>-0.54</b>             | 1.76     | 2.67 | 0.97       | 7.32        | 7.17        | -0.15        | 1.09     | 1.55 | 0.97       |
| Sum-15              | 2.55        | 2.42        | -0.13          | 1.10     | 1.55     | 0.75       | 296.6       | 296.2       | -0.41                    | 1.63     | 2.35 | 0.97       | 14.13       | 13.40       | -0.73        | 1.73     | 2.38 | 0.95       |
| Fal-15              | 2.47        | 2.46        | -0.01          | 1.06     | 1.48     | 0.77       | 287.1       | 286.7       | -0.40                    | 1.59     | 2.31 | 0.98       | 9.06        | 8.67        | -0.38        | 1.11     | 1.59 | 0.97       |
| Win-15              | 2.56        | 2.64        | 0.07           | 1.13     | 1.58     | 0.77       | 275.2       | 274.6       | <b>-0.63</b>             | 1.86     | 2.82 | 0.98       | 4.01        | 4.00        | -0.02        | 0.61     | 0.90 | 0.98       |

476 <sup>a</sup> Spr – spring, Sum – summer, Fal – fall, Win – winter.

477 <sup>b</sup> The values exceeding the benchmark range are highlighted in bold.

**Table S3.** Performance statistics for the comparison between simulated AOD/NO<sub>2</sub> column and satellite retrievals over the ECC region (units are 10<sup>15</sup> molecules/cm<sup>2</sup> for NO<sub>2</sub> vertical column density and Dobson unit for AOD, except those noted in the table).

|                     | AOD         |             |            |            |            |            |      |                | NO <sub>2</sub> column |             |            |            |            |            |      |                |
|---------------------|-------------|-------------|------------|------------|------------|------------|------|----------------|------------------------|-------------|------------|------------|------------|------------|------|----------------|
|                     | Mean<br>OBS | Mean<br>SIM | NMB<br>(%) | NME<br>(%) | MFB<br>(%) | MFE<br>(%) | RMSE | R (no<br>unit) | Mean<br>OBS            | Mean<br>SIM | NMB<br>(%) | NME<br>(%) | MFB<br>(%) | MFE<br>(%) | RMSE | R (no<br>unit) |
| Avg-05 <sup>a</sup> | 0.53        | 0.54        | 1          | 22         | -9         | 27         | 0.16 | 0.83           | 3.92                   | 4.19        | 7          | 31         | -13        | 35         | 2.28 | 0.91           |
| Spr-05              | 0.60        | 0.58        | -3         | 27         | -15        | 37         | 0.21 | 0.78           | 3.47                   | 3.23        | -7         | 34         | -33        | 47         | 2.03 | 0.89           |
| Sum-05              | 0.59        | 0.40        | -32        | 33         | -45        | 46         | 0.22 | 0.86           | 2.68                   | 2.09        | -22        | 43         | -53        | 62         | 1.85 | 0.82           |
| Fal-05              | 0.48        | 0.47        | -2         | 20         | -7         | 24         | 0.12 | 0.85           | 3.80                   | 4.27        | 12         | 36         | -8         | 36         | 2.82 | 0.89           |
| Win-05              | 0.49        | 0.78        | 62         | 71         | 43         | 54         | 0.42 | 0.63           | 5.79                   | 7.19        | 24         | 40         | 21         | 44         | 3.72 | 0.90           |
| Avg-10              | 0.53        | 0.51        | -5         | 22         | -13        | 28         | 0.16 | 0.79           | 5.10                   | 6.12        | 20         | 35         | 6          | 35         | 3.48 | 0.89           |
| Spr-10              | 0.61        | 0.54        | -12        | 28         | -23        | 36         | 0.23 | 0.71           | 4.10                   | 5.30        | 29         | 49         | 17         | 53         | 3.63 | 0.84           |
| Sum-10              | 0.62        | 0.41        | -33        | 37         | -44        | 47         | 0.28 | 0.81           | 2.95                   | 3.03        | 3          | 48         | -19        | 47         | 3.05 | 0.73           |
| Fal-10              | 0.44        | 0.40        | -10        | 24         | -12        | 29         | 0.14 | 0.76           | 5.50                   | 6.15        | 12         | 35         | 1          | 34         | 3.99 | 0.86           |
| Win-10              | 0.46        | 0.72        | 55         | 66         | 41         | 53         | 0.40 | 0.63           | 7.88                   | 9.99        | 27         | 38         | 20         | 41         | 4.90 | 0.91           |
| Avg-15              | 0.44        | 0.44        | 0          | 31         | -8         | 34         | 0.19 | 0.62           | 4.30                   | 4.38        | 2          | 34         | -20        | 39         | 2.73 | 0.85           |
| Spr-15              | 0.54        | 0.55        | 0          | 36         | -12        | 40         | 0.26 | 0.63           | 3.44                   | 3.47        | 1          | 42         | -22        | 48         | 2.62 | 0.80           |
| Sum-15              | 0.48        | 0.30        | -37        | 42         | -49        | 54         | 0.25 | 0.67           | 2.75                   | 2.25        | -18        | 49         | -48        | 62         | 2.22 | 0.69           |
| Fal-15              | 0.36        | 0.35        | -3         | 32         | -3         | 35         | 0.16 | 0.63           | 4.32                   | 4.84        | 12         | 42         | -8         | 42         | 3.41 | 0.82           |
| Win-15              | 0.41        | 0.62        | 50         | 63         | 38         | 56         | 0.36 | 0.52           | 6.71                   | 6.94        | 4          | 32         | -9         | 39         | 3.76 | 0.88           |

<sup>a</sup> Avg – annual average, Spr – spring, Sum – summer, Fal – fall, Win – winter.

**Table S4.** Performance statistics for the comparison between simulated and observed PM<sub>10</sub> concentrations in major cities over the Eastern and Central China (ECC).

| Variables <sup>a</sup>        | 2005 |       |                        |      |       | 2010 |      |      |      |       | Model performance criteria |
|-------------------------------|------|-------|------------------------|------|-------|------|------|------|------|-------|----------------------------|
|                               | Avg  | Spr   | Sum                    | Fal  | Win   | Avg  | Spr  | Sum  | Fal  | Win   |                            |
| Mean SIM (µg/m <sup>3</sup> ) | 66.2 | 79.2  | 41.7                   | 66.4 | 77.3  | 62.4 | 60.5 | 42.0 | 66.1 | 81.1  |                            |
| Mean OBS (µg/m <sup>3</sup> ) | 96.1 | 102.5 | 75.5                   | 98.6 | 107.9 | 89.5 | 91.5 | 69.1 | 92.3 | 104.9 |                            |
| NMB (%)                       | -31  | -23   | -45                    | -33  | -28   | -30  | -34  | -39  | -28  | -23   |                            |
| NME (%)                       | 49   | 50    | 51                     | 42   | 49    | 46   | 49   | 52   | 43   | 40    |                            |
| MFB (%)                       | -48  | -44   | <b>-69<sup>b</sup></b> | -42  | -39   | -47  | -53  | -58  | -40  | -37   | ±60%                       |
| MFE (%)                       | 63   | 64    | 71                     | 54   | 64    | 60   | 64   | 68   | 56   | 52    | ±75%                       |

<sup>a</sup> Avg – annual average, Spr – spring, Sum – summer, Fal – fall, Win – winter.

<sup>b</sup> The values exceeding the model performance criteria are highlighted in bold.

**Table S5.** Performance statistics for the comparison between simulated and observed PM<sub>2.5</sub> concentrations in major cities over the ECC region in 2013 and 2015.

| Variables <sup>a</sup>        | 2013 |      |      |      |       | 2015 |      |      |      |      | Model performance criteria |
|-------------------------------|------|------|------|------|-------|------|------|------|------|------|----------------------------|
|                               | Avg  | Spr  | Sum  | Fal  | Win   | Avg  | Spr  | Sum  | Fal  | Win  |                            |
| Mean SIM (µg/m <sup>3</sup> ) | 61.9 | 58.6 | 38.8 | 54.3 | 95.1  | 46.7 | 45.0 | 30.6 | 40.4 | 70.9 |                            |
| Mean OBS (µg/m <sup>3</sup> ) | 74.1 | 66.2 | 46.7 | 69.8 | 113.8 | 56.5 | 51.4 | 39.7 | 49.8 | 85.2 |                            |
| NMB (%)                       | -16  | -12  | -17  | -22  | -16   | -17  | -13  | -23  | -19  | -17  |                            |
| NME (%)                       | 35   | 36   | 38   | 32   | 35    | 34   | 38   | 39   | 34   | 30   |                            |
| MFB (%)                       | -21  | -21  | -21  | -26  | -17   | -25  | -24  | -32  | -24  | -20  | ±60%                       |
| MFE (%)                       | 40   | 42   | 41   | 37   | 40    | 41   | 44   | 45   | 39   | 35   | ±75%                       |

<sup>a</sup> Avg – annual average, Spr – spring, Sum – summer, Fal – fall, Win – winter.
